# Supplementary material for: Effectiveness of Computer Tailoring Versus Peer Support Web-Based Interventions in Promoting Physical Activity Among Insufficiently Active Canadian Adults With Type 2 Diabetes: Protocol for a Randomized Controlled Trial
Source: PubMed Central journal article supplement (PMC4768043; doi:10.2196/resprot.5019), 2016-02-11

• **PC Users:** Use "Ctrl" and "+" to zoom in and "Ctrl" and "-" to zoom out

• **MAC users:** Use "Command" and "+" to zoom in and "Command" and "-" to zoom out

# Multimedia Appendix

## Trial Overview

Timeline and intervention components

**Core Behavior Change Strategy For Both Interventions Are Highlighted In Light Blue-Green**

Fully automated, tailored, Web-based intervention

Intervention components

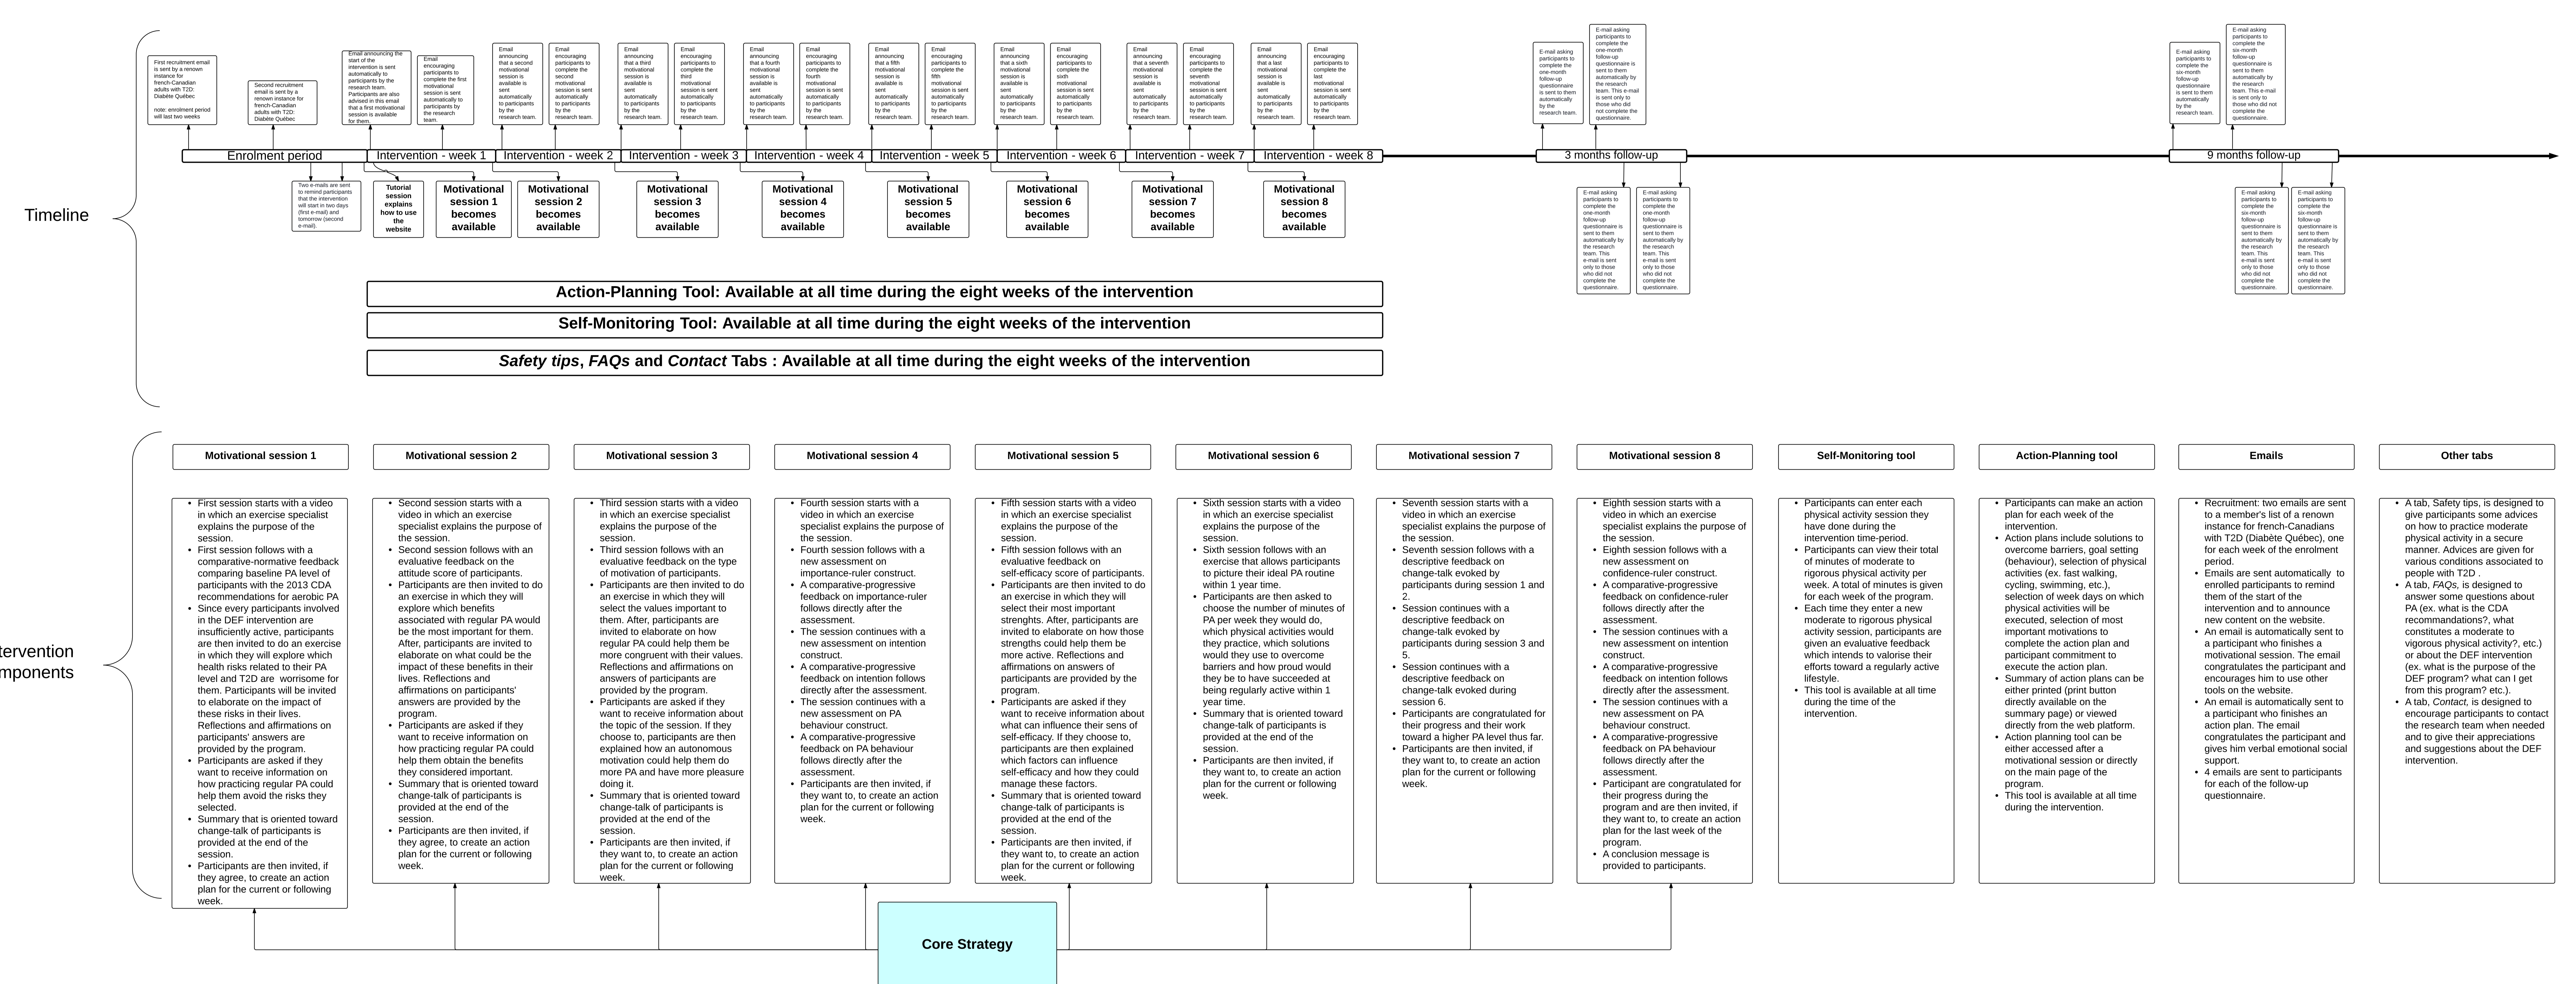

Facebook assisted, general, Web-based intervention

Intervention components

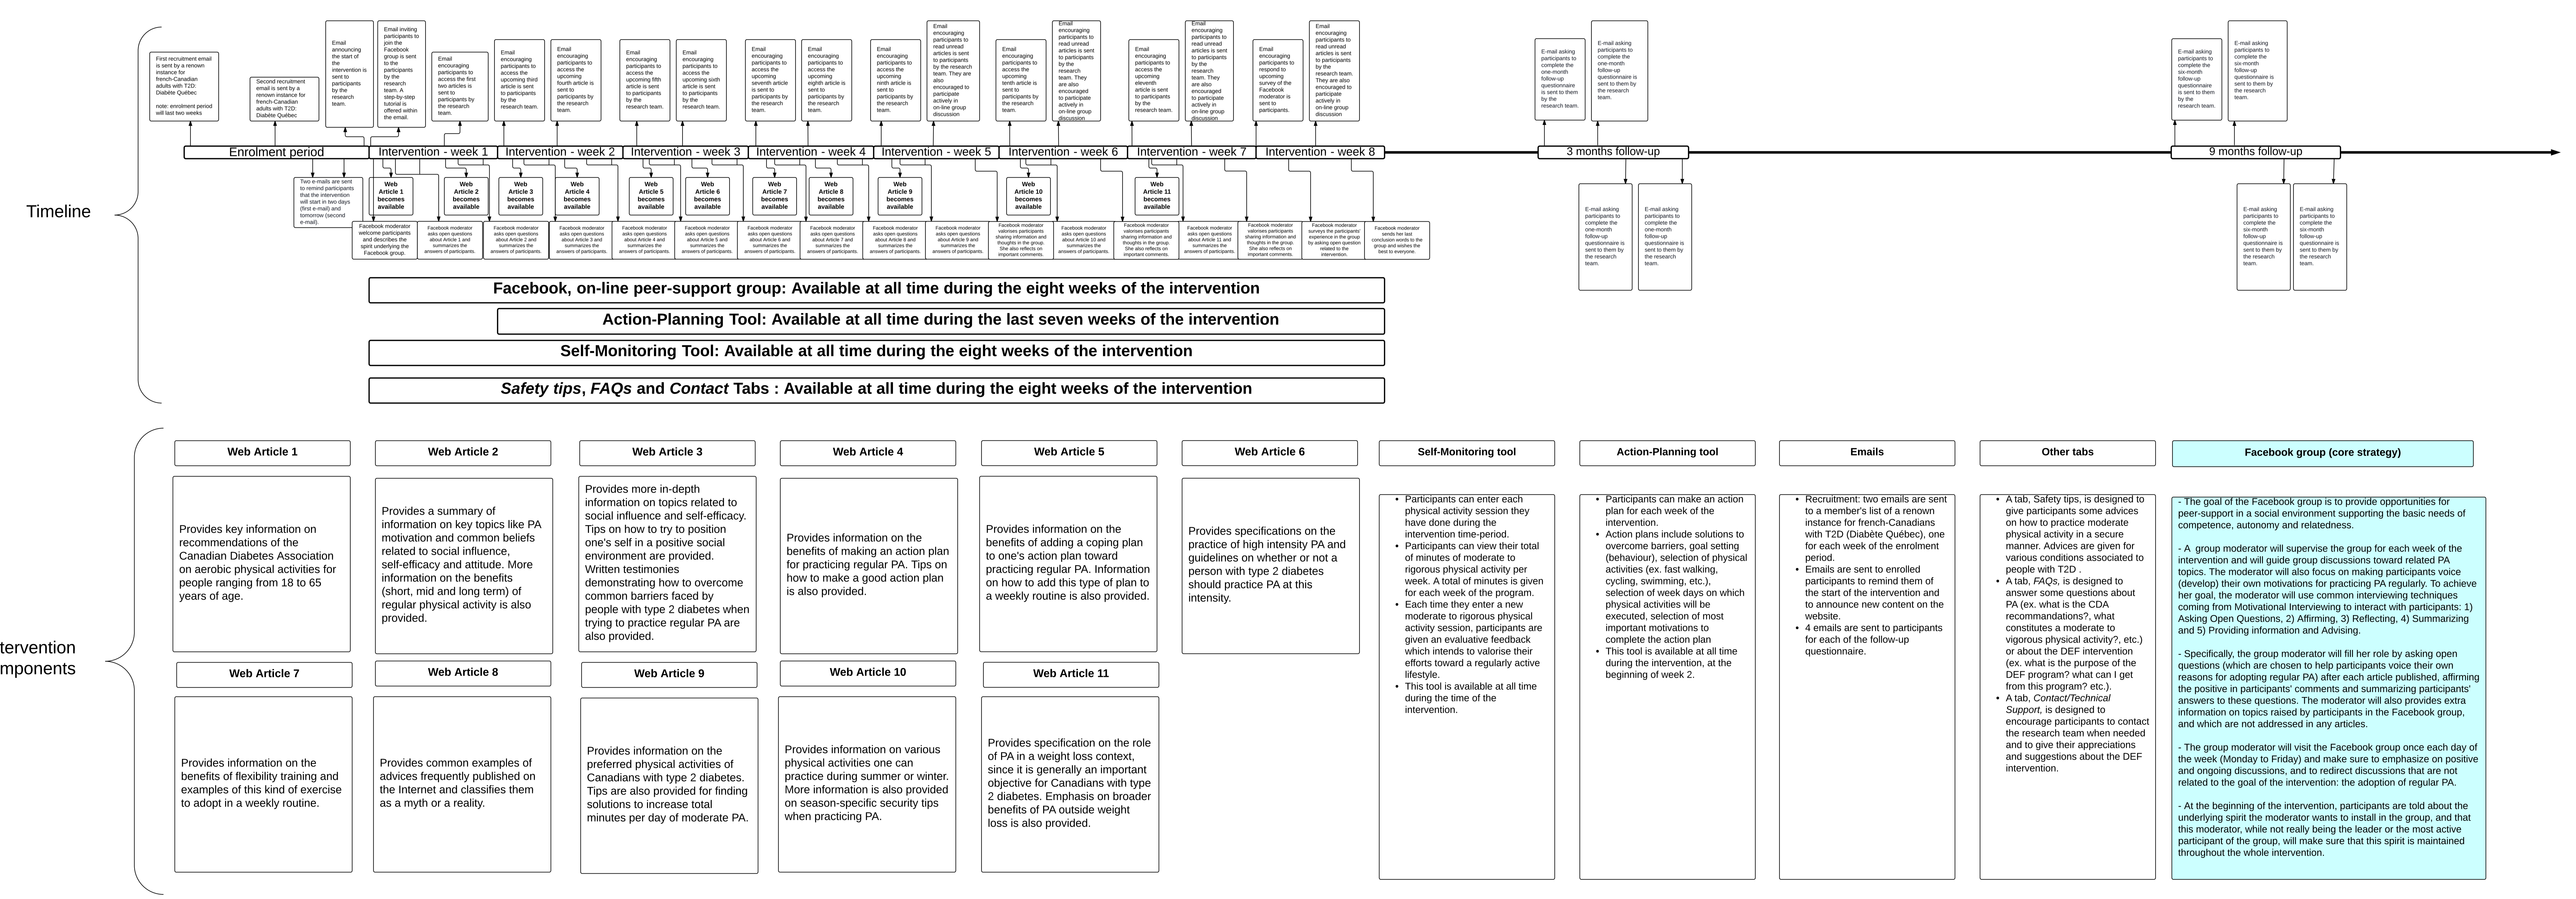

Control group

Intervention components

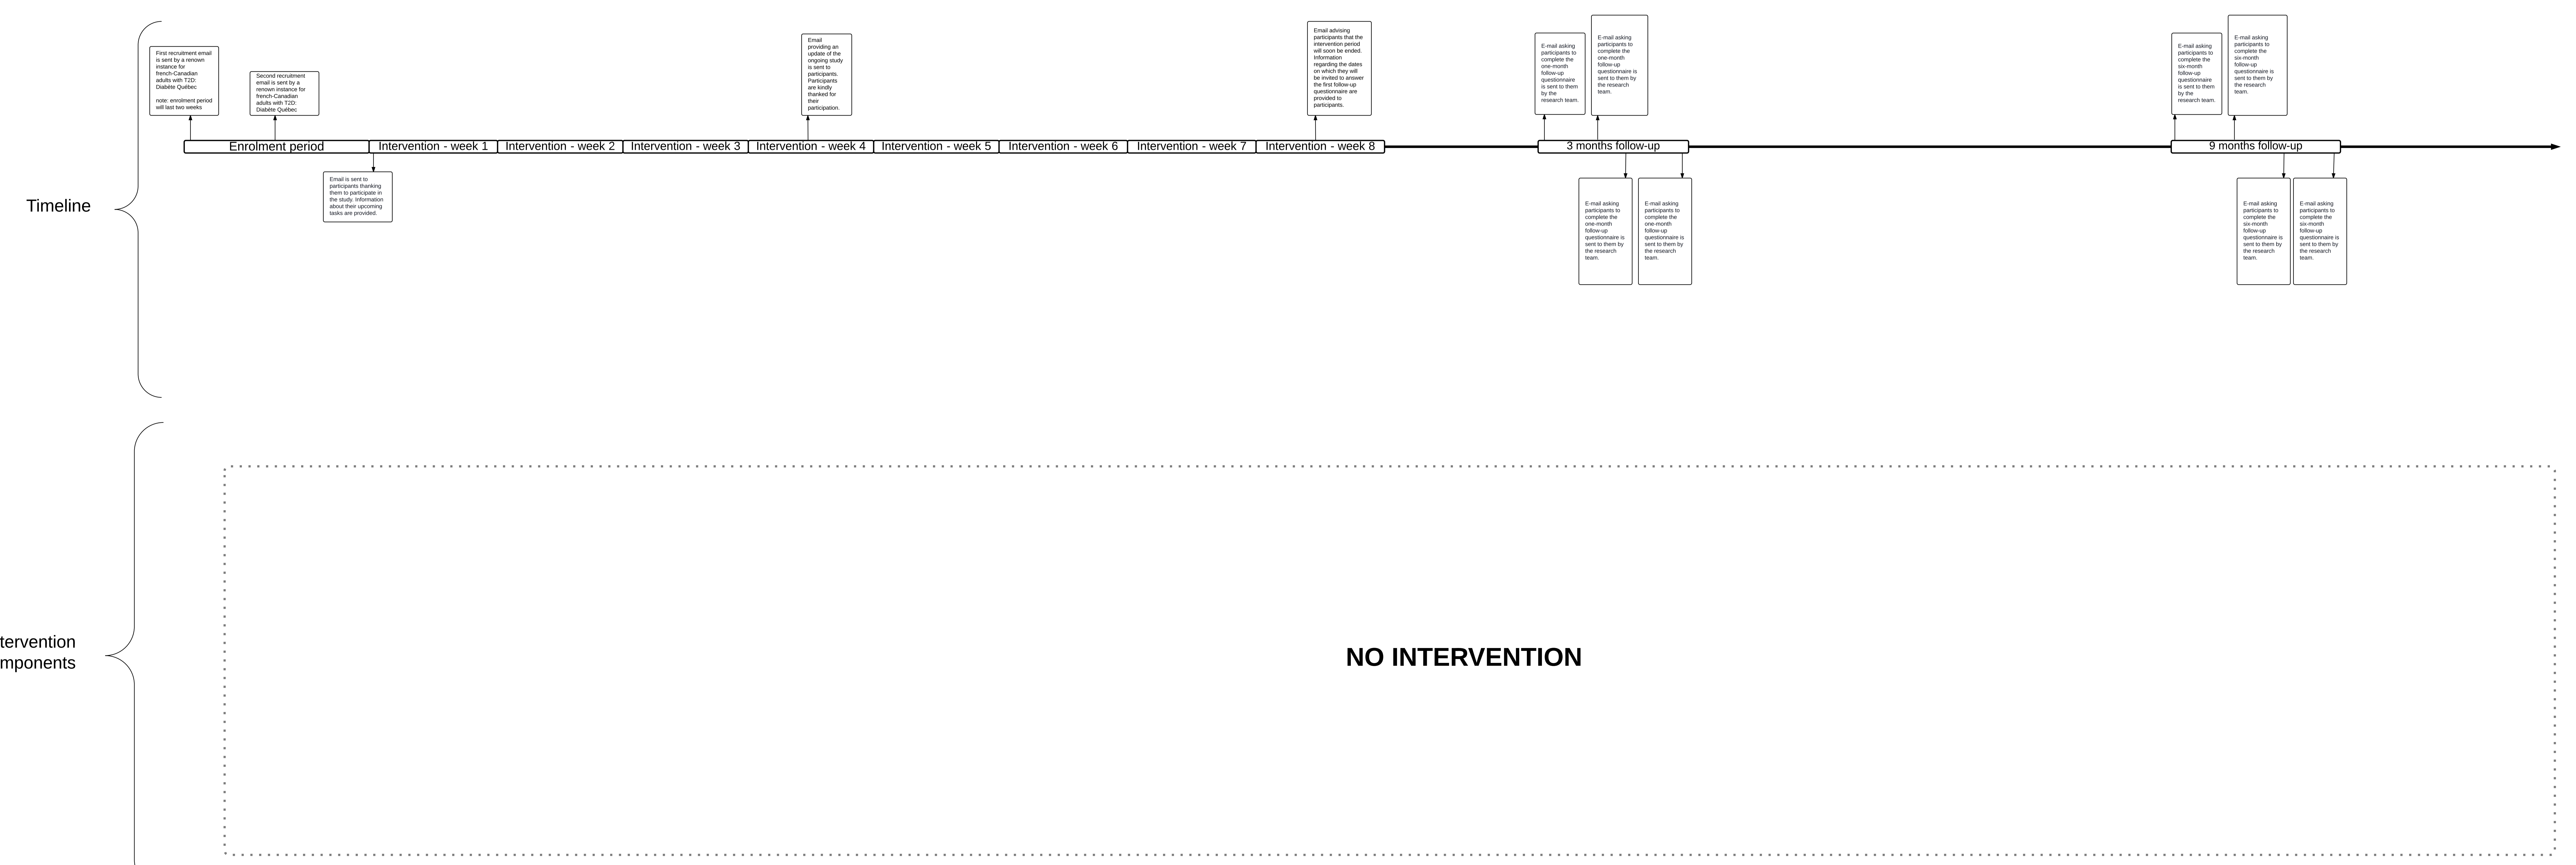

Supplement: resprot_v5i1e20_app2.pdf [file resprot_v5i1e20_app2.pdf]
