# Supplementary material for: Effectiveness of Computer Tailoring Versus Peer Support Web-Based Interventions in Promoting Physical Activity Among Insufficiently Active Canadian Adults With Type 2 Diabetes: Protocol for a Randomized Controlled Trial
Source: PubMed Central journal article supplement (PMC4768043; doi:10.2196/resprot.5019), 2016-02-11
Supplement: resprot_v5i1e20_app4.pdf [file resprot_v5i1e20_app4.pdf]

# Multimedia Appendix Websites' layouts

Fully-automated,  
tailored, Web-based  
intervention

Log-in Page

The screenshot shows the log-in page for 'DIABÈTE EN FORME'. At the top left is the logo. To the right are input fields for 'Courriel' and 'Mot de passe', and a 'Se connecter' button. Below the inputs is a link 'Oublié votre mot de passe?'. The main content area features a video player with the title 'DEMARREZ LA VIDEO' and a play button. To the left of the video are three bullet points: 'Connaitre votre niveau d'activités physiques actuel', 'Développer votre confiance et votre motivation', and 'Planifier vos activités physiques et devenir une personne régulièrement active, à votre façon.' Below these is a green button 'Je veux m'inscrire' and a blue button 'En savoir plus'. At the bottom, there is a footer with 'Un projet réalisé par:' (UQTR, Université du Québec à Trois-Rivières), 'Partenaires:' (Fonds de la recherche en santé Québec), and 'Questions?'

Peer support,  
Web-based  
intervention

Log-in Page

This screenshot is identical to the one on the left, showing the log-in page for 'DIABÈTE EN FORME' with the same layout, including the logo, login fields, video player, and navigation buttons.

Home Page  
(when logged in)

The screenshot shows the home page for a logged-in user. At the top is a navigation bar with 'Accueil', 'Conseils sécurité', 'Foire aux questions', and 'Nous contacter'. The user's email 'test\_def@uqtr.ca' and a 'Déconnexion' link are visible. A blue banner reads: 'Bon Jeudi Demo User! Nous sommes heureux de vous souhaiter la bienvenue au tout début de votre programme Diabète en Forme. Vous pouvez accéder à votre première séance d'informations dès maintenant en cliquant ici: ACCÉDER. Vous pouvez également vous y rendre via "Mes séances". Bonne navigation!' Below the banner are three main sections: 'Mes séances' with a speech bubble icon and 'ENTRER' button; 'Mes plans d'action' with a clipboard icon and 'ENTRER' button; and 'Mon journal' with a bar chart icon and 'ENTRER' button.

Home Page  
(when logged in)

This screenshot shows the home page for a logged-in user with a dark header. It includes a 'Bonjour' greeting, a 'Se déconnecter' link, and the 'DIABÈTE EN FORME' logo. A navigation bar contains 'Accueil Diabète en forme', 'Chroniques sur l'activité physique', 'Mon Journal d'activité physique', 'Pratiquer l'activité physique en toute sécurité', and 'Rejoignez-nous sur facebook'. The main heading is 'Bienvenue sur le site Diabète en forme !' followed by 'Pourquoi un site Internet sur l'activité physique ?'. A video player shows people kayaking. The text explains the benefits of physical activity for diabetes management. A list of benefits is provided in a table:

|                                                                   |
|-------------------------------------------------------------------|
| ▪ un bien-être et une meilleure forme physique ;                  |
| ▪ une diminution des risques de maladies cardiovasculaires ;      |
| ▪ une diminution de la pression artérielle ;                      |
| ▪ un meilleur contrôle du poids ;                                 |
| ▪ une réduction du stress et une augmentation de l'estime de soi. |

Comment le site *Diabète en forme* peut-il vous aider à intégrer l'activité physique dans votre vie de tous les jours ?
